# Supplementary material for: Carbon-coated mesoporous NiO nanoparticles as an electrode material for high performance electrochemical capacitors
Source: Royal Society of Chemistry journal article supplement (doi:10.1039/c3nj00890h), 2013-01-01
Supplement: c3nj00890h.pdf [file c3nj00890h.pdf]

# Carbon-Coated Mesoporous NiO Nanoparticles as an Electrode Material for High Performance Electrochemical Capacitors

Kaibing Xu, Rujia Zou\*, Wenyao Li, Qian Liu, Teng Wang, Jianmao Yang, Zhigang Chen and Junqing Hu\*

State Key Laboratory for Modification of Chemical Fibers and Polymer Materials, College of Materials Science and Engineering, Donghua University, Shanghai 201620, China.

E-mail: hu.junqing@dhu.edu.cn, rjzou@dhu.edu.cn

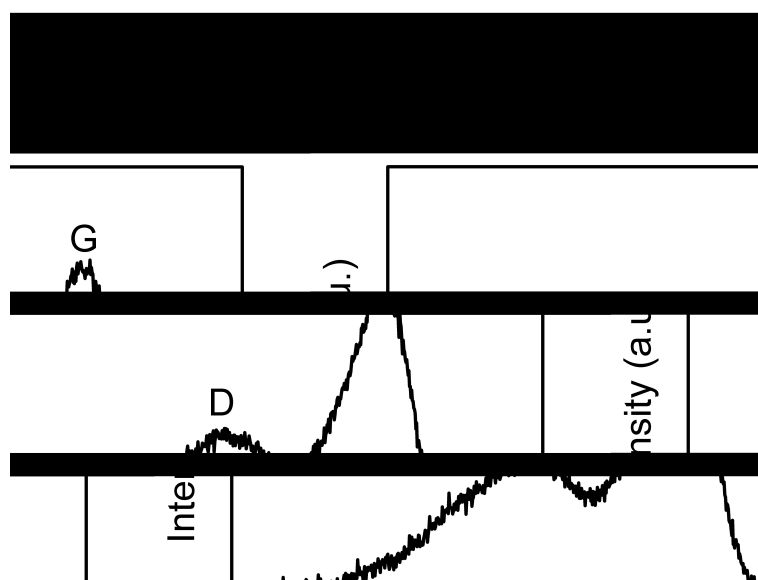

Fig. S1 The Raman spectrum of the mesoporous NiO@C nanocomposites.

The D peak G peak are observed and demonstrate the successful introduction of amorphous carbon.[1-4]

[1] D. Bresser, E. Paillard, R. Kloepsch, S. Krueger, M. Fiedler, R. Schmitz, D. Baither, M. Winter, S. Passerini, *Adv. Energy Mater.*, 2012, **3**, 513.

[2] M. F. Hassan, M. M. Rahman, Z. P. Guo, Z. X. Chen, H. K. Liu, *J. Mater. Chem.*, 2010, **20**, 9707.

[3] L. C. Yang, L. L. Liu, Y. S. Zhu, X. J. Wang, Y. P. Wu, *J. Mater. Chem.*, 2012, **22**, 13148.

[4] J. P. Liu, J. Jiang, C. W. Cheng, H. X. Li, J. X. Zhang, H. Gong, H. J. Fan, *Adv. Mater.*, 2011, **23**, 2076.

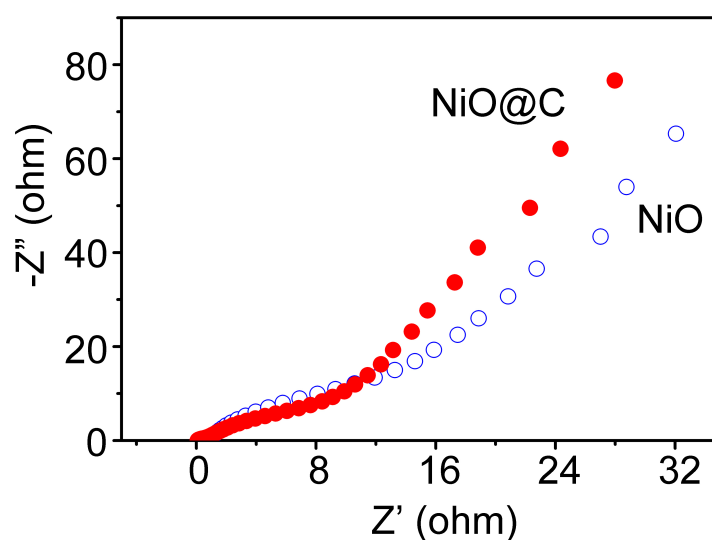

Fig. S2 EIS spectra of the mesoporous NiO and NiO@C electrode materials.

Electrochemical impedance spectroscopy (EIS) has been applied to investigate electrical conductivity of the supercapacitor electrodes. Fig. S2 shows the Nyquist impedance spectra of the mesoporous NiO and NiO@C electrode materials. The EIS spectra are composed of three distinct regions.[1,2] First, the intercept on the real axis in the high frequency range provides the equivalent series resistance (ESR) ( $R_s$ ), which includes the inherent resistances of the electro active material, bulk resistance of electrolyte, and contact resistance at the interface between electrolyte and electrode.

Second, the charge transfer resistance ( $R_{ct}$ ), which results from diffusion of electrons, can be calculated from the diameter of semicircle in the high frequency range. Third, Warburg resistance, which describes the diffusion of redox species in the electrolyte, can be reflected from the slope of the EIS curve in the low frequency range. The magnitude of  $R_s$  obtained for the NiO and NiO@C electrode materials are 0.19 and 0.09 $\Omega$ , respectively. And also the diameter of semicircle for NiO@C is smaller than NiO, which indicates that the NiO@C provide an ideal pathway for ion and electron transport without kinetic limitations. The above results demonstrate that a thin carbon shell within these nanocomposites can improve electron conductivity of the overall electrode.

[1] S. K. Meher, G. R. Rao, *J. Phys. Chem. C*, 2011, **115**, 15646.

[2] R. B. Rakhi, W. Chen, D. Cha, H. N. Alshareef, *Nano Lett.*, 2012, **12**, 2559.

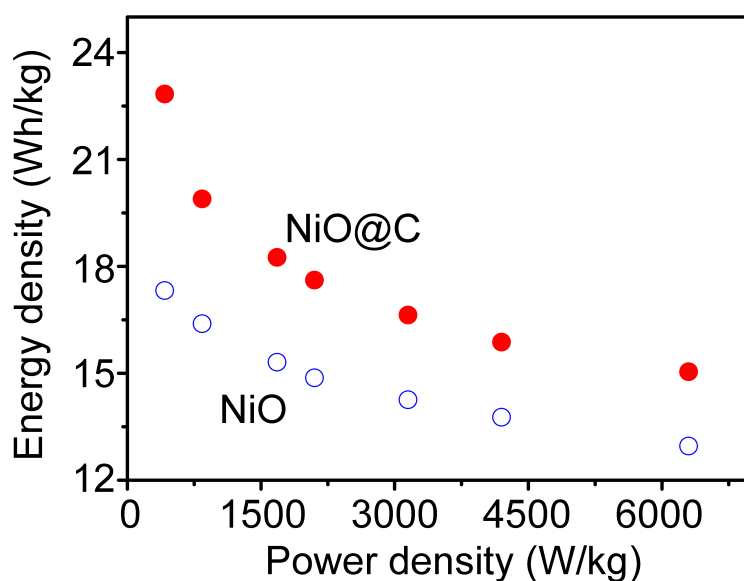

Fig. S3 Ragone plots of the mesoporous NiO and NiO@C electrode materials.

The power density and energy density have been calculated from the following equations, respectively:  $E=0.5 C \Delta V^2$ ,  $P=E/t$ , where  $E$  ( $\text{Wh kg}^{-1}$ ) is the energy density,  $P$  ( $\text{W kg}^{-1}$ ) is the power density,  $C$  ( $\text{F g}^{-1}$ ) is the specific capacitance,  $\Delta V$  (V) is the potential window of discharge,  $t$  (s) is the discharge time.[1] Fig. S3 shows the Ragone plots of the mesoporous NiO and NiO@C electrode materials. At a power density of  $420 \text{ W kg}^{-1}$ , the mesoporous NiO@C electrode materials deliver an energy density as high as  $22.8 \text{ Wh kg}^{-1}$ , which is larger than that of the mesoporous NiO electrode materials. More importantly, the energy density of the NiO@C electrode materials is still as high as  $15 \text{ Wh kg}^{-1}$  even at a high power density of  $6300 \text{ W kg}^{-1}$ .

[1] J. Yan, E. Khoo, A. Sumboja, P. S. Lee, *ACS Nano*, 2010, **4**, 4247.
